# Supplementary material for: Regioselective hydroxylation of the xylyl linker in a diiron(iii) complex having a carboxylate-rich ligand with H2O2
Source: Royal Society of Chemistry journal article supplement (doi:10.1039/b304171a), 2003-01-01
Supplement: b304171a.doc [file b304171a.doc]

**Supporting Information**

**Regioselective Hydroxylation of Xylyl Linker in a Diiron(III) Complex having a Carboxylate-Rich Ligand with H2O2**

Hideki Furutachi, Mizue Murayama, Amane Shiohara, Satoshi Yamazaki, Shuhei Fujinami, Akira Uehara, Masatatsu Suzuki,* Seiji Ogo, Yoshihito Watanabe, and Yonezo Maeda

**Experimental Section**

**Synthesis of Ligands.** **H4xylta·1.5H2O.** To a mixture of bromoacetic acid (41.816 g, 0.30 mol) and lithium hydroxide monohydrate (12.627 g, 0.30 mol) in water (100 ml) containing phenolphthalein was added *m*-xylenediamine (10.0 g, 73.4 mmol). The reaction mixture was stirred at 70˚C for 3 hours and during the reaction, pH was maintained at ~10 by addition of lithium hydroxide monohydrate (12.627 g, 0.30 mol). After the mixture was cooled to ambient temperature, the solution was made acidic (pH = ca. 1) by addition of conc. HCl to give white powder. Yield: 24.3 g (84 %). Anal. Calcd for C16H23N2O9.5: C, 48.61; H, 5.86; N, 7.09 %. Found: C, 48.56; H, 5.79; N, 7.01 %. 1H NMR (D2O in the presence of K2CO3) : ** (ppm) = 3.33 (8H, s, NCH2CO2), 3.92 (4H, s, PhCH2N), 7.38 – 7.46 (4H, m, PhH).

**pyxyl·4(HClO4)·0.5H2O.** A mixture of **, **’-dibromo-1,3-xylene (5.00 g, 18.9 mmol), bis(2-pyridylmethyl)amine (7.55 g, 37.9 mmol), and sodium carbonate (4.70 g, 37.9 mmol) in methanol (150 ml) was stirred at ambient temperature for 3 days. Then the mixture was condensed to almost dryness under reduced pressure. To the residue was added water (150 ml) and the oily layer separated was extracted with three 50 ml-portions of chloroform. The chloroform extracts were combined and dried over Na2SO4. After filtration, chloroform was removed under a reduced pressure to give a brown oil, which was dissolved in 60 % HClO4. The mixture was allowed to stand for several days at 5 ˚C to afford white powder. Yield: 8.55 g (50 %). Anal. Calcd for C32H37N6Cl4O16.5 : C, 42.17; H, 4.09; N, 9.22 %. Found: C, 42.21; H, 4.02; N, 9.12 %. 1H NMR (free form, CDCl3) : ** (ppm) = 3.69 (4H, s, PhCH2N), 3.80 (8H, s, pyCH2N), 7.13 (4H, t, pyH), 7.24 – 7.31 (5H, m, PhH and pyH), 7.58 – 7.64 (7H, m, PhH and pyH), 8.51 (4H, d, pyH).

**Synthesis of Complexes. Complex 1.** To a solution of FeCl3·6H2O (0.541 g, 2.0 mmol) in water (10 ml) was added an aqueous solution (20 ml) containing H4xylta·1.5H2O (0.395 g, 1.0 mmol) and Et3N (0.405 g, 4.0 mmol) to give a yellowish white suspension. The suspension was dissolved by addition of CH3CO2Na·3H2O (0.816 g, 6.0 mmol) with stirring to produce a dark yellowish green solution. The solution was cooled at 0 ˚C and then a solution of 30 % H2O2 (0.5 ml, 5.0 mmol) in water (2 ml) was slowly added with vigorous stirring to give a dark red solution. After the reaction mixture was stirred for 1.5 hours at 0˚C and a methanol solution (10 ml) of (n-Bu)4NBr (0.322 g, 1.0 mmol) was added. The mixture was allowed to stand for several days at ambient temperature to give red crystals suitable for X-ray crystallography. Yield: 0.56 g (62 %). Anal. Calcd for C36H63N3Fe2O16: C, 47.75; H, 7.01; N, 4.64 %. Found: C, 47.63; H, 7.10; N, 4.60 %. Mössbauer at 80 K: ** = 0.46 mm s-1 and *E*Q = 0.58 mm s-1. ESI-TOF/MS (CH3CN): *m/z* (%, accurate mass) = 608.9655 [M]- (100, 608.9743). UV-vis [/ nm (** / M-1 cm-1)] in CH3CN: featureless spectrum with a shoulder around ~450 nm (br, 600).

**Complex 2.** To a mixture of Fe(ClO4)3·9H2O (0.516 g, 1.0 mmol), pyxyl·4(HClO4)·0.5H2O (0.456 g, 0.5 mmol), and Et3N (0.203 g, 2.0 mmol) in methanol/acetonitrile (1:2, 30 ml) was added CH3CO2Na·3H2O (0.408 g, 3.0 mmol) to give a dark brown solution. The mixture was allowed to stand for several days under vapor of methanol to give brown crystals suitable for X-ray crystallography. Yield: 0.31 g (62 %). Anal. Calcd for C75H89N13Cl4Fe4O30: C, 44.64; H, 4.45; N, 9.02 %. Found: C, 44.44; H, 4.44; N, 9.23 %. Mössbauer at 80 K: ** = 0.46 mm s-1 and *E*Q = 1.55 mm s-1. ESI-TOF/MS (CH3CN): *m/z* (%, accurate mass) = 373.0800 [M]4+ (100, 373.0798), 530.4262 [M(ClO4)]3+ (94, 530.4229), and 845.1238 [M(ClO4)2]2+ (9, 845.1088). UV-vis [/ nm (** (Fe4) / M-1 cm-1)] in CH3CN: 350 (14400), 368 (sh, 13000), 417 (sh, 3300), 465 (2500), 505 (2100), 544(sh, 500), 719 (340).

**Ligand recovery.** **xylta4-:** Typically, to an aqueous mixture (28 ml) containing 0.20 M aqueous H4xylta·1.5H2O solution (0.14 ml) containing 4 equivalents of Et3N, 1.20 M aqueous CH3CO2Na·3H2O solution (0.14 ml), and 0.40 M aqueous FeCl3·6H2O solution (0.14 ml) was slowly added 1.0 M aqueous H2O2 (140 l diluted by 2.0 ml water) with vigorous stirring to generate a dark red solution. After stirred for 1.5 hours at 0˚C, the solution was evaporated to dryness under reduced pressure. The residue was dissolved in D2O (~0.6 ml), to which was added sodium dithionite (ca. 195 mg, ~20 equiv./[Fe2]) and potassium cyanide (ca. 65 mg, ~18 equiv./[Fe2]). The amounts of xylta4- and xyta-O5- were determined by 1H NMR by addition of a known amount of sodium 2,2-dimethyl-2-silapentane-5-sulfonate (DSS) as an internal standard. Total amounts of xylta4- and xylta-O5- recovered were 92 ± 1% for three experiments. Yields of xylta-O5- for the reactions by 1 and 5 equiv. H2O2/[Fe2] were 23 ± 1 and 74 ± 2%, respectively. 1H NMR (D2O) : xyta4- : ** (ppm) = 3.26 (s, 8H; NCH2CO2), 3.89 (s, 4H; PhCH2N), 7.36 – 7.44 (m, 4H; PhH); xyta-O5- : 3.35 (s, 8H; NCH2CO2), 3.96 (s, 4H; PhCH2N), 6.82 (t, 1H; PhH), 7.19 (d, 2H; PhH).

**pyxyl:** Typically, to an acetonitrile/water mixture (28 ml, 1:1) containing 0.02 M acetonitrile solution (1.4 ml) of **2** was slowly added 1.0 M aqueous H2O2 (280 l diluted by 2.0 ml water) with vigorous stirring. After stirred for 1.5 hours at 0˚C, the solution was made basic (pH = ca. 10) by addition of an aqueous solution of NaOH to give iron hydroxide, which was removed by filtration, washed with acetonitrile. The resulting solution was extracted with three 20 ml-portions of chloroform. The chloroform extracts were combined and dried over Na2SO4. After filtration, chloroform was removed under a reduced pressure to give a brown oil, which was dissolved in CDCl3. The amount of pyxyl was determined by 1H NMR by addition of a known amount of 2,6-dimethyl-1,4-benzoquinone as an internal standard. Total amount of pyxyl recovered was 98 ± 1% for three experiments (5 equiv. H2O2/[Fe2]).

**Isotope Labeling Experiment.** Isolation of an 18O-labeled sample of **1** was carried out by the same way as that for **1** except that H218O2 prepared from 95% 18O2 was used instead of H216O2. ESI-TOF/MS (CH3CN): *m/z* (%) = 610.9687 [M]- (100).

**Physical measurements**. Electronic spectra were measured on an Otsuka Electronics MCPD-2000 spectrophotometer with an optical glass fiber attachment with the corrected light path lengths of 0.69 cm. 1H NMR spectra were measured with a JEOL JNM-LA400 spectrometer using tetramethylsilane (TMS in CDCl3) or sodium 2,2-dimethyl-2-silapentane-5-sulfonate (DSS in D2O) as an internal standard. Mössbauer spectra were measured with S-600 constant-acceleration spectrometer (Austin Science Associates). Temperature was controlled with a temperature controller (ITC502, Oxford Instruments) within a variable temperature cryostat (DN1726, Oxford Instruments). The data were stored in a 1024-channel analyzer (IT-5200, Inotech Inc.). A 10 mCi cobalt-57 source diffused into a palladium foil was used. The spectra were fitted by a Lorentzian line shape using software of IGOR Pro (WaveMetrics, Inc.) on a personal computer. The velocity scales and isomer shifts were normalized to iron foil at room temperature. ESI-TOF/MS spectra were measured with a Micromass LCT spectrometer. Accurate masses (in *m/z*) are referenced to the tetra-n-octylammonium ion (*m/z* = 466.5352 in positive ion detection) or tetraphenyl borate ion (*m/z* = 3191663 in negative ion detection) as an internal standard.

**X-ray Crystallography. General Procedures**. X-ray diffraction studies for (n-Bu)4N[Fe2(xylta-O)(CH3CO2)2]·3H2O (**1·Bu4N**) and [Fe4(pyxyl)2(O)2(CH3CO2)4](ClO4)4-·CH3CN·CH3OH (**2**) were made on a Rigaku RAXIS-IV imaging plate area detector using graphite monochromated Mo-K radiation (** = 0.71070 Å). Crystal-to-detector distance was 120 mm. In order to determine the cell constants and the orientation matrix, three oscillation photographs were taken with an oscillation angle 2˚. Intensity data were collected by taking oscillation photographs. The data were corrected for Lorentz and polarization effects, but not for the absorption effect.

The structures were solved by direct method (SHELXS-86)1 and expanded using a Fourier technique.2 The structures were refined by a full-matrix least-squares method by using the teXsan crystallographic software package (Molecular Structure Corporation).3 Hydrogen atoms were positioned at calculated positions. They were included, but not refined, in the final least-squares cycles.

**(n-Bu)4N[Fe2(xylta-O)(CH3CO2)2]·3H2O (1·Bu4N)**. A plate crystal (0.5  0.5  0.2 mm) was mounted on a glass fiber at ambient temperature. An asymmetric unit consists of a complex anion, a tetra-n-butylammonium cation, and three water molecules. All non-hydrogen atoms were refined with anisotropic displacement parameters.

**[Fe4(pyxyl)2(O)2(CH3CO2)4](ClO4)4·CH3CN·CH3OH (2)**. A block crystal (0. 5  0.5  0.5 mm) was mounted on a glass fiber at ambient temperature. An asymmetric unit consists of a half of a complex cation, two perchlorate anions, a half of methanol and acetonitrile molecules. One perchlorate anion, methanol and acetonitrile molecules were solved by disordered models. All non-hydrogen atoms, except for those of the methanol and acetonitrile molecules, were refined with anisotropic displacement parameters. The water molecules in the asymmetric unit were suggested by the elemental analysis, although we could not locate the water molecules.

1 Sheldrick, G. M. SHELXS-86. A Program for Crystal Structure Determination. University of Göttingen, FRG, 1986.

2 Beurskens, P. T.; Admiraal, G.; Beurskens, G.; Bosman, W. P.; de Gelder, R.; Israel, R.; Smits, J. M. M. The DIRDIF-94 program system (1994), Technical Report of the Crystallography Laboratory, University of Nijmegen, The Netherlands.

3 teXsan: Crystal Structure Analysis Package, Molecular Structure Corporation (1985 & 1992).

Figure S1: ESI-TOF/MS spectra of (**a**) a yellowish green aqueous solution containing 1 equiv. of H4xylta, 4 equiv. of Et3N, 2 equiv. of FeCl3, and 6 equiv. of CH3CO2Na diluted by CH3CN (1:1, ~2.5 mM) and (**b**) a dark red solution obtained by addition of 5 equiv. of H2O2 after 30 minutes of mixing. BPh4– ion was used as an internal standard.

Figure S2: Electronic spectral changes of (**a**) the reaction of 80 equiv. of H2O2 with a yellowish green aqueous solution (~0.83 mM) containing 1 equiv. of H4xylta, 4 equiv. of Et3N, 2 equiv. of FeCl3, and 6 equiv. of CH3CO2Na and (**b**) the reaction of **1** with 80 equiv of H2O2 in water (~0.61 mM) containing 4 equiv. of CH3CO2Na at 0 ˚C. Insets: Time courses of the absorbance changes at 450 nm (the interval of the spectral change is 2 second).

Figure S3: ESI-TOF/MS spectra of (**a**) **1** and (**b**) an 18O-labeled sample of **1** prepared by H218O2 in acetonotrile. BPh4– ion was used as an internal standard.

Figure S4: 1H NMR spectra of (**a**) xylta4- recovered from an aqueous mixture containing H4xylta, Et3N, FeCl3, and CH3CO2– (1 : 4 : 2 : 6) in D2O in the presence of KCN and Na2S2O4, (**b**) xylta–O5- recovered from **1** in D2O in the presence of KCN and Na2S2O4, and (**c**) xylta4- and xylta–O5- recovered from the hydroxylation reaction mixture given in the text.

Figure S5: ESI-TOF/MS spectra of **2** in acetonitrile. (n–Octyl)4N+ cation was used as an internal standard.
